# Supplementary material for: Oxygen vacancy engineered SrTiO3 nanofibers for enhanced photocatalytic H2 production
Source: Royal Society of Chemistry journal article supplement (doi:10.1039/c9ta03701b), 2019-01-01
Supplement: c9ta03701b1.pdf [file c9ta03701b1.pdf]

## Supporting Information

### Oxygen vacancy engineered SrTiO<sub>3</sub> nanofibers for enhanced photocatalytic H<sub>2</sub> production

5 Chuan-Qi Li,<sup>a,b</sup> Sha-Sha Yi,<sup>\*,a,c</sup> De-Liang Chen,<sup>a</sup> Yan Liu,<sup>b</sup> Ya-Jie Li,<sup>b</sup> Si-Yu Lu,<sup>b</sup> Xin-Zheng Yue,<sup>\*,b,c</sup> and Zhong-Yi Liu<sup>\*,b,c</sup>

<sup>a</sup>School of Materials Science and Engineering, Zhengzhou University, Zhengzhou 450001, China.

<sup>b</sup>College of Chemistry and Molecular Engineering, Zhengzhou University, Zhengzhou 450001, 10 China.

<sup>c</sup>Henan Institutes of Advanced Technology, Zhengzhou University, 97 Wenhua Road, Zhengzhou 450003, China.

15 \*Corresponding author: Sha-Sha Yi

E-mail: yiss@zzu.edu.cn

## 1. Experimental section

**1.1 Synthesis of SrTiO<sub>3</sub> nanofibers (NFs):** A simple electrospinning method was employed to fabricate the SrTiO<sub>3</sub> (STO) NFs. In a typical process, certain amount of polyvinylpyrrolidone (PVP, average molecular weight of  $1.3 \times 10^6$ ) and strontium nitrate (Sr(NO<sub>3</sub>)<sub>2</sub>,  $\geq 99.5\%$ ) were first dissolved into the mixed solution including 1.5 mL of ethanol (CH<sub>3</sub>CH<sub>2</sub>OH,  $\geq 95.0\%$ ), 1.5 mL of N,N-dimethylformamide (DMF,  $\geq 99.5\%$ ), 1.5 mL of acetic acid ( $\geq 99.8\%$ ), 1 mL of deionized water (18.2 M $\Omega$ ·cm), and 0.3 mL of tetrabutyl titanate (TBOT,  $\geq 98.0\%$ ). After various stirring for 48 h at room temperature, the obtained transparent pale yellow solution was injected into the syringe in a controlled electrospinning setup. The vertical distance between the nozzle tip and the grounded stainless collector and the voltage were conducted at 16 cm and 15 kV, respectively. After several hours later, calcination was performed at 600°C for 3 h at a heating rate of 2°C min<sup>-1</sup> in air atmosphere to convert the collected white product into STO NFs, labeled as STO-A.

**1.2 Thermal treatment on STO-A:** STO-A NFs were treated by H<sub>2</sub>/N<sub>2</sub> atmosphere (20 vol% in H<sub>2</sub>) in the vacuum tube furnace at different heating temperature and reaction time, respectively, varying in the range of 400-1000°C (T) and 1-3 h (t). The as-prepared specimens were named as STO-NH. For comparison, STO-A photocatalyst treated in N<sub>2</sub> atmosphere (99.999%) at 600°C for 3 h was also prepared, labeled as STO-N.

**1.3 Characterization:** The field emission scanning electron microscope (FESEM) images were obtained with a JEOL JSM 6700F electron microscope. The transmission electron microscopy (TEM) and high-resolution TEM (HRTEM) images were conducted on a Tecnai G2 S-Twin F20 TEM microscope (FEI Company). The energy-dispersive X-ray (EDX) spectroscopy, the scanning TEM-EDX element mapping, and the selected area electron diffraction (SAED) were carried out on a HITACHI SU-8020 transmission electron microscopy. The crystalline

structure of the as-prepared samples was characterized by powder X-ray diffraction (XRD) with a Rigaku D/Max-2550 diffractometer using Cu K $\alpha$  radiation ( $\lambda = 1.54056 \text{ \AA}$ ) at 50 kV and 200 mA in the  $2\theta$  range of 20-80° at a scanning rate of 4 and 0.5° min<sup>-1</sup>, respectively. X-ray photoelectron spectroscopy (XPS) measurements were performed on a Thermo VG Scientific ESCALAB 250 spectrometer using monochromatized Al K $\alpha$  excitation. The UV-visible diffuse reflectance spectra (UV-vis DRS) of the samples were measured on a UV-vis-NIR spectrophotometer (Shimadzu UV-3600) detecting absorption over the range of 300-800 nm. The steady-state photoluminescence (PL) emission spectra with an excitation wavelength of 350 nm were measured on a FLUOROMAX-4. The electron paramagnetic resonance (EPR) spectra were collected using a BRUCER EMXplus-9.5/12 spectrometer at 9.44 GHz at 300 K.

**1.4 Photocatalytic H<sub>2</sub> production from water reduction:** The photocatalytic H<sub>2</sub> production experiments were performed at atmospheric pressure in a 300 mL Pyrex glass reaction cell containing 25 mg of photocatalyst, 90 mL of H<sub>2</sub>O and 10 mL of triethanolamine (TEOA, 98%), in which TEOA was used as a sacrificial reagent. Before reaction, the mixture solution was sonicated for 10 min in an ultrasonic bath to get uniform suspension. Then, a 300 W Xe lamp with cooling water (stabilize the temperature at 277 K) was served as the simulated solar light source to trigger the photocatalytic reaction and the suspension was continuously stirred to ensure uniform irradiation. H<sub>2</sub> gas production was analyzed using an online gas chromatograph (GC-8A, Shimadzu Co., Japan, with N<sub>2</sub> as the carrier gas) equipped with an MS-5A column and a thermal conductivity detector (TCD). The stability test was performed by using the method mentioned above under the same condition. Once the photocatalytic reaction of a cycle test of 4 h was completed, the second cycle was performed after the reactor was fully degassed in vacuum. Before the third cycle begins, 10 mL of TEOA was added into the reaction. Finally, the test was performed for 4 cycles.

The apparent quantum efficiency (AQE) was measured on STO-NH specimen under

monochromatic light irradiation of 365 nm according to the following equation S1:<sup>[14]</sup>

$$AQE(\%) = \frac{2 \times \text{Number of evolved } H_2 \text{ molecules}}{\text{Number of incident photons}} \times 100 = \frac{2 \times N_1}{N_2} \times 100 \quad (S1)$$

where  $N_1$  and  $N_2$  represent the number of evolved  $H_2$  molecules and number of incident photons, respectively.

5 **1.5. Electrochemical and photoelectrochemical measurements:** Typically, the electrochemical and photoelectrochemical (PEC) measurements were performed in a three-electrode system by employing an electrochemical analyzer (CHI760E Instruments), in which the as-prepared specimen film, Pt wire and Ag/AgCl (saturated KCl) were served as the working electrode, counter electrode and reference electrode, respectively. In this work, the  
10 working electrodes includes STO-A, STO-N and STO-NH sepcimen films, seen the preparation method as described in earlier report.<sup>[S1]</sup> All the electrochemical and PEC measurements were carried out in potassium hydroxide (KOH,  $\geq 90\%$ ) aqueous solution (1 M, pH = 13.6). For PEC reaction, the simulated solar light was generated with a 300 W Xe lamp (CEL-HXF300, Beijing China Education Au-light Co., Ltd) equipped with an AM 1.5G optical  
15 filter. Electrochemical impedance spectroscopy (EIS) were performed under light irradiation with 5 mV perturbation and a frequency range from 100 kHz to 0.1 Hz at potential of 0 V vs. Ag/AgCl. Mott-Schottky (M-S) plots were performed and recorded over an AC frequency of 1 kHz in dark condition to judge the characteristic of semiconductor types as well as obtain their flat band potentials. Open circuit potential (OCP) decay curves were collected after  
20 turning off the light irradiation, analyzing the charge decay behaviors in the photocatalysts. Current-time ( $i-t$ ) curves were performed on a light turn-on/off system with an applied potential of 0 V vs. Ag/AgCl.

2. *Supplemental Figures and Tables*

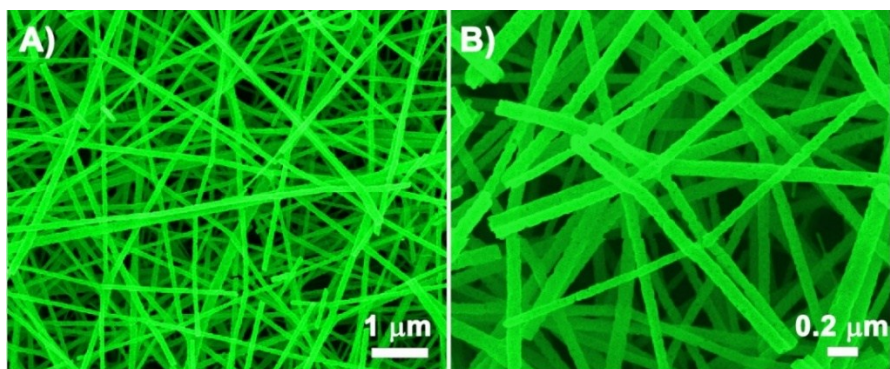

**Fig. S1** FESEM images of STO-A in (A) low- and (B) high-magnification.

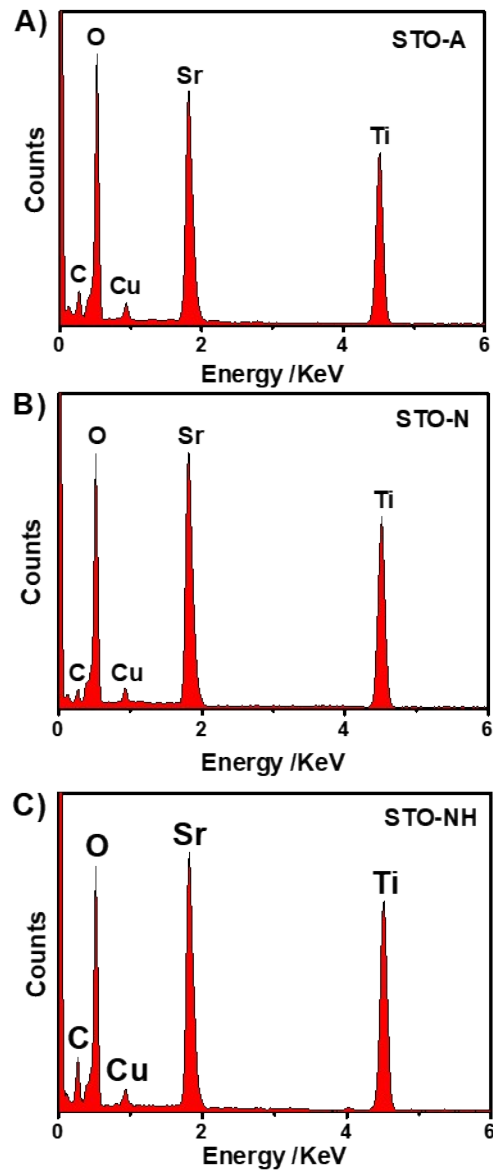

**Fig. S2** EDX spectra of (A) STO-A, (B) STO-N and (C) STO-NH.

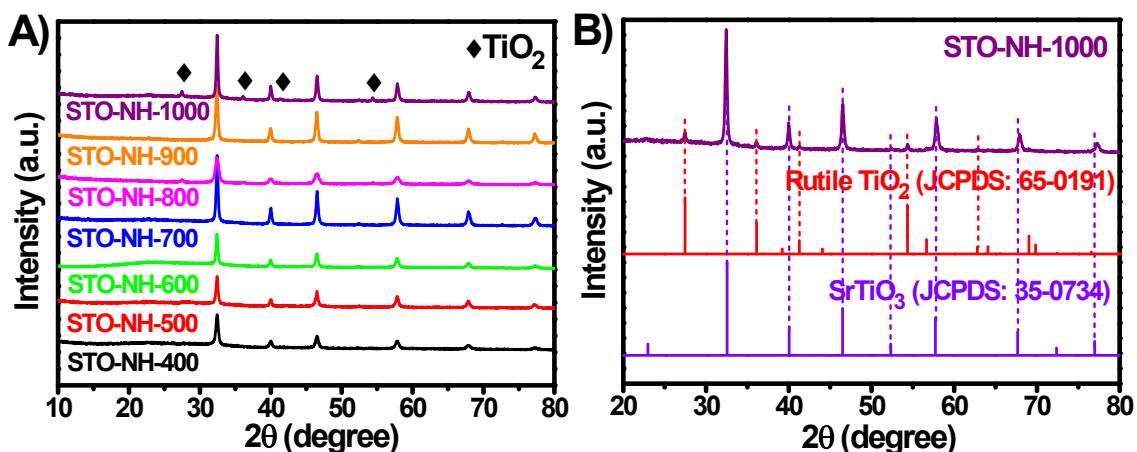

**Fig. S3** XRD patterns of (A) STO-NH prepared at different reaction temperature from 400 to 1000°C and (B) STO-NH obtained at 1000°C.

Fig. S3 demonstrates the STO-NH specimens prepared at different reaction temperature from 400 to 1000°C. It can be seen that no impurity phases are observed for STO-NH-T (where T is 400, 500, 600, 700, 800 and 900°C), and all the peaks can be well-indexed to the  $\text{SrTiO}_3$  (JCPDS No. 35-0734). While a set of additional diffraction peaks can be observed on STO-NH sample obtained at 1000°C as compared to other STO-NH specimens (Fig. S3B), of which can be assigned to the rutile phase of  $\text{TiO}_2$  (JCPDS No. 65-0191).

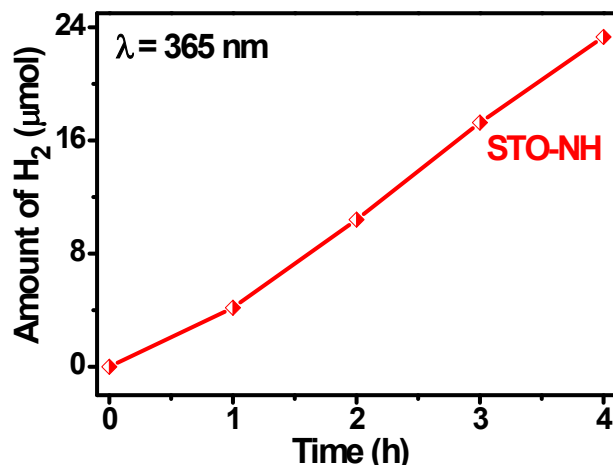

**Fig. S4** Typical time course of H<sub>2</sub> production of STO-NH at 365 nm in 10 vol% TEOA aqueous solution.

To achieve the apparent quantum efficiency (AQE) of STO-NH, the photocatalytic H<sub>2</sub> production test was performed under monochromatic light irradiation of 365 nm in 10 vol% TEOA aqueous solution, as shown in Fig. S4. The average incident light intensity and irradiation area are measured to be 5.34 mW cm<sup>-2</sup> and 28.27 cm<sup>2</sup>, respectively.

In addition, the amount of H<sub>2</sub> production of STO-NH was collected to be 23.32 μmol during the irradiation of 4 h. Thus, the number of evolved H<sub>2</sub> molecules (N<sub>1</sub>) was calculated to be  $9.74 \times 10^{14} \text{ molecule s}^{-1}$  according to  $N_1 = N_A \times M$ , wherein N<sub>A</sub> is the Avogadro's constant ( $6.02 \times 10^{23} \text{ molecules mol}^{-1}$ ) and M is the average H<sub>2</sub> generation rate (mol s<sup>-1</sup>).

To obtain the number of incident photons (N<sub>2</sub>), the equation of  $N_2 = \frac{E\lambda}{hc}$  is adopted. As a result, the calculated value of N<sub>2</sub> is  $2.77 \times 10^{17} \text{ photons s}^{-1}$ , wherein E is the power of lamp source, h is the Planck's constant ( $6.63 \times 10^{-34} \text{ J}\cdot\text{s}$ ), and c is the speed of light ( $3.0 \times 10^8 \text{ m s}^{-1}$ ).

As a result, the AQE of STO-NH was calculated to be 0.70% according equation S1.



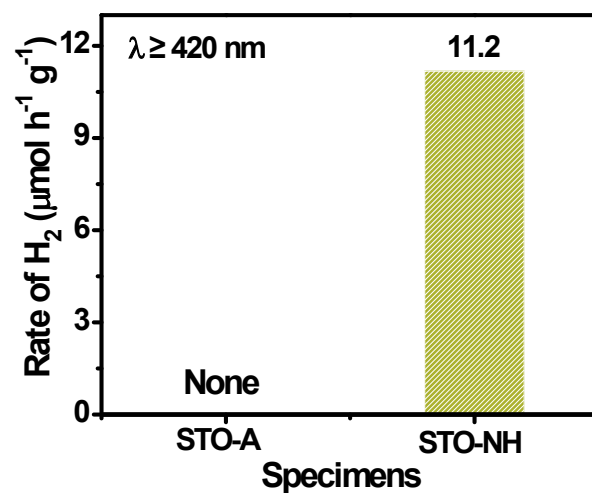

**Fig. S5** Photocatalytic H<sub>2</sub> production rates of STO-A and STO-NH specimens under visible light irradiation ( $\lambda \geq 420$  nm).

To verify how the enhanced light harvesting ability influence the photocatalytic performance of STO-NH, Fig. S5 compares the photocatalytic H<sub>2</sub> production rates of STO-A and ATO-NH under visible light irradiation ( $\lambda \geq 420$  nm). As a result, no H<sub>2</sub> was detected on STO-A, while STO-NH showed the low H<sub>2</sub> production rate of 11.2  $\mu\text{mol h}^{-1} \text{g}^{-1}$ .

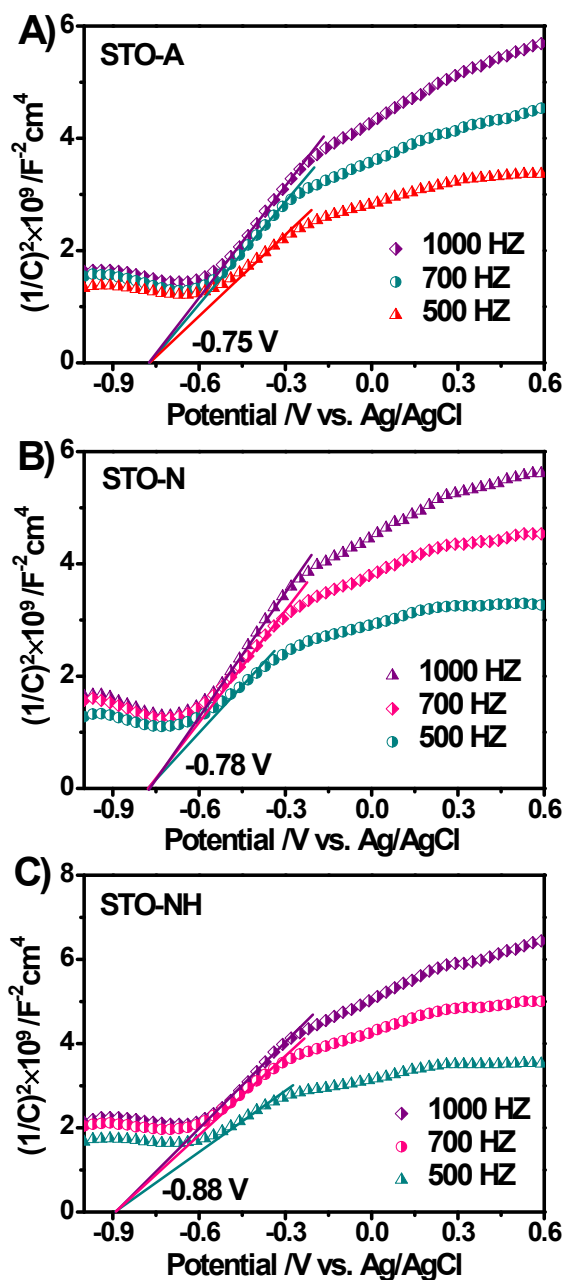

**Fig. S6** M-S plots of (A) STO-A, (B) STO-N, and (C) STO-NH specimens under various frequencies of 500, 700 and 1000 Hz in dark condition.

As shown in Fig. S6, the Mott-Schottky (M-S) plots of STO-A, STO-N, and STO-NH electrodes are conducted and recorded over an AC frequencies of 500, 700 and 1000 Hz in dark. The flat band potentials ( $E_{fb}$ ) of these materials are estimated according to the following equation S2:<sup>[S2]</sup>

$$\frac{1}{C^2} = \frac{2}{e\epsilon\epsilon_0 N_D} \left[ (E - E_{fb}) - \frac{\kappa T}{e} \right] \quad (S2)$$

where C is the space charge capacitance,  $\epsilon_0$  is the relative dielectric constant of SrTiO<sub>3</sub>,  $\epsilon$  is the vacuum permittivity ( $8.85 \times 10^{-12}$  F m<sup>-1</sup>),  $N_D$  is the charge donor density (cm<sup>-3</sup>), E is the electrode applied potential,  $E_{fb}$  is the flat band potential,  $\kappa$  is the Boltzmann's constant ( $1.38 \times$   
5  $10^{-23}$  J K<sup>-1</sup>), T is the absolute temperature (in K) which is generally small and could be neglected, and e is the electron charge.

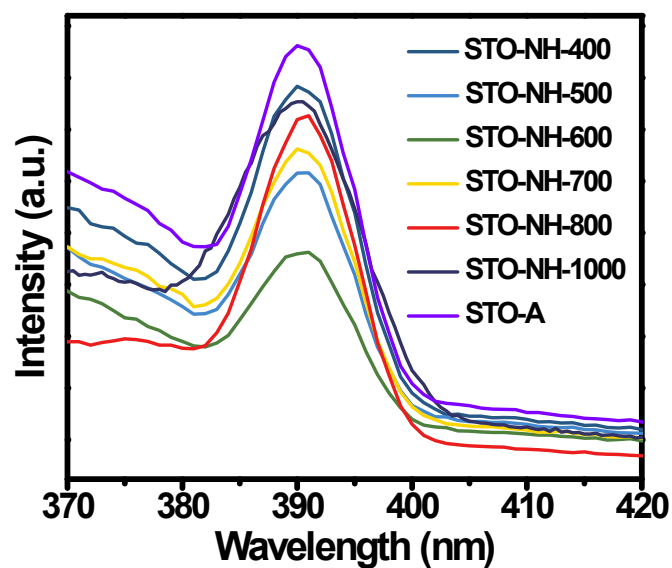

**Fig. S7** PL spectra of STO-NH prepared at different temperature range from 400 to 1000°C.

Fig. S7 shows the PL emission peaks for STO-NH samples obtained by treating STO-A in  $H_2/N_2$  atmosphere under the temperature range from 400 to 1000°C. It can be seen that, as compared to STO-A, the PL peak intensity significantly decreased with the increase of treatment temperature and reaches a minimum at 600°C. The above result suggests that the highest separation of charge carriers is achieved when the treatment temperature is 600°C. That is to say, increasing the treatment temperature above 600°C can not bring about further separation of electron-hole pairs. These results are agreement with the photocatalytic performances (Fig. 4A).

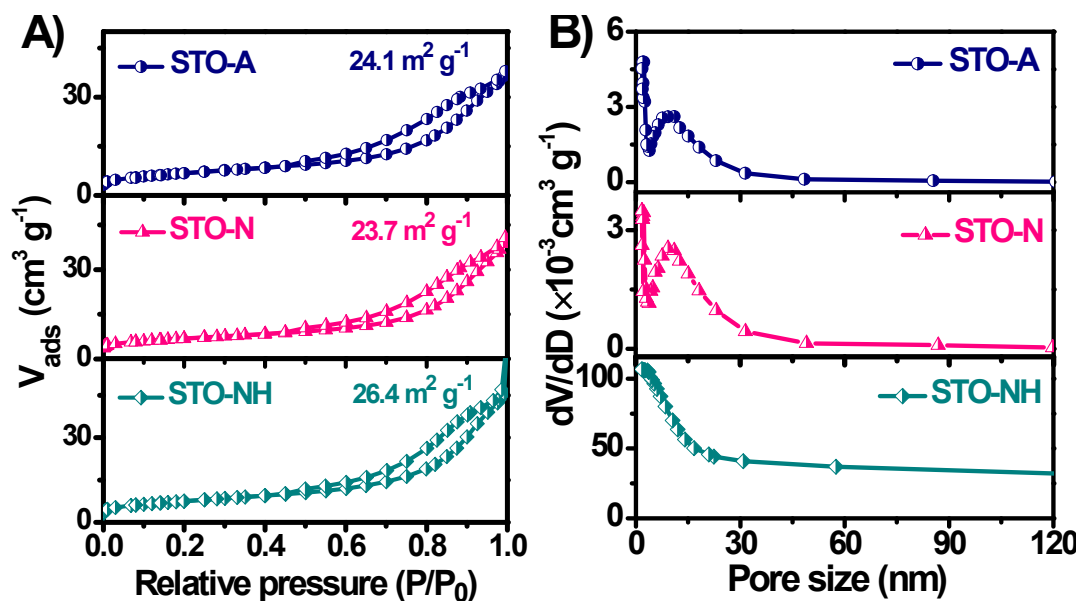

**Fig. S8** (A)  $N_2$  adsorption-desorption isotherms and (B) BJH pore size distribution of STO-A, STO-N and STO-NH specimens.

To study how the thermal treatment affects the Brunauer-Emmett-Teller (BET) surface areas and porous structures, the  $N_2$  adsorption-desorption isotherms and BJH pore size distributions for STO-A, STO-N and STO-NH photocatalysts are carried out. As illustrated in Fig. S8, the isotherms of all the samples belong to type IV physisorption isotherm and exhibit H3-type hysteresis behavior,<sup>[S3]</sup> indicating the presence of mesopores. The specific surface areas of STO-A, STO-N and STO-NH are 24.1, 23.7 and 26.4  $m^2 g^{-1}$ , respectively, meaning that the introduction of OV's can not improve the surface area of STO-A.

**Table S1** Comparison of the catalytic activities and preparation methods for the defective SrTiO<sub>3</sub>-based photocatalysts reported recently.

| Catalyst                                                | Photocatalytic performance                | Photocatalytic reaction condition                                                      | Cocatalyst                     | Preparation method                                                                           | Ref.      |
|---------------------------------------------------------|-------------------------------------------|----------------------------------------------------------------------------------------|--------------------------------|----------------------------------------------------------------------------------------------|-----------|
| Oxygen vacancy SrTiO <sub>3-x</sub>                     | 2286 μmol h <sup>-1</sup> g <sup>-1</sup> | 400 W high-pressure Hg lamp; pH 12; Glucose = 1.0 g L <sup>-1</sup>                    | 0.5 wt% Pt                     | Treatment at 400°C in 5% H <sub>2</sub> /N <sub>2</sub> mixed gas flow                       | 24        |
| SrTiO <sub>3</sub> nanocubes                            | 6236 μmol h <sup>-1</sup> g <sup>-1</sup> | 300 W Xe lamp                                                                          | 1 wt% Pt                       | SrCO <sub>3</sub> , Ti powder, TiO <sub>2</sub> , NaCl and KCl were annealed at 700°C in air | S4        |
| SrTiO <sub>3</sub> @SrTiO <sub>3-x</sub>                | 2200 μmol h <sup>-1</sup> g <sup>-1</sup> | 300 W Xe lamp, aqueous methanol solution (25 vol %)                                    | 1 wt% Pt                       | Reaction with NaBH <sub>4</sub> at 325°C in Ar                                               | 35        |
| Ti <sup>3+</sup> defects in SrTiO <sub>3</sub>          | 2250 μmol h <sup>-1</sup> g <sup>-1</sup> | 300 W Xe lamp, aqueous methanol solution (25 vol%)                                     | 9.6% to 14.7% (Pt:Ti)          | Annealed at 1000°C in tube furnace                                                           | S5        |
| H:SrTiO <sub>3</sub>                                    | 708 μmol h <sup>-1</sup> g <sup>-1</sup>  | 300 W Xe lamp, aqueous CH <sub>3</sub> OH solution (20 vol%),                          | 0.5 wt% Pt                     | Reaction with NaBH <sub>4</sub> at 350°C in N <sub>2</sub>                                   | S6        |
| Self-doped SrTiO <sub>3-δ</sub> powders                 | -                                         | 300 W Xe lamp                                                                          | 0.3 wt% Pt                     | Anneal in Ar from 1200 to 1400°C                                                             | S7        |
| La and Cr co-doped SrTiO <sub>3</sub>                   | 20 μmol h <sup>-1</sup> g <sup>-1</sup>   | Visible light irradiation (≥ 420 nm), 5 M NaOH solution filled with methanol (10 vol%) | 1.0 wt% Pt or PtO <sub>x</sub> | Calcined at 1000 °C for 12 h and fired at 1250°C for 16 h                                    | S8        |
| SrTiO <sub>3</sub> single crystals (HSTONP-700)         | 0.15 μmol g <sup>-1</sup> h <sup>-1</sup> | 300 W Xe lamp, aqueous methanol solution (50 vol %)                                    | None                           | Treatment at 700°C in H <sub>2</sub> gas (Linde, 99.99%)                                     | 29        |
| Oxygen vacancy engineered SrTiO <sub>3</sub> nanofibers | 330 μmol h <sup>-1</sup> g <sup>-1</sup>  | 300 W Xe lamp, triethanolamine solution (10 vol%)                                      | None                           | Hydrogen treatment at 600°C in 20% H <sub>2</sub> /N <sub>2</sub> mixed gas flow             | This work |

### 3. Supplemental references

- [S1] X. Yue, S. Yi, R. Wang, Z. Zhang and S. Qiu, *J. Mater. Chem. A* 2017, **5**, 10591-10598.
- [S2] X. J. Wen, C. G. Niu, L. Zhang, C. Liang and G. M. Zeng, *J. Catal.* 2017, **356**, 283-299.
- [S3] K. S. W. Sing, *Pure Appl. Chem.* 1982, **54**, 2201-2218.
- 5 [S4] G. Zhang, W. Jiang, S. Hua, H. Zhao, L. Zhang and Z. Sun, *Nanoscale.* 2016, **8**, 16963-16968.
- [S5] H. Chen, F. Zhang, W. Zhang, Y. Du and G. Li, *Appl. Phys. Lett.* 2018, **112**, 013901.
- [S6] B. Wang, S. Shen and L. Guo, *ChemCatChem.* 2016, **8**, 798-804.
- [S7] K. Xie, N. Umezawa, N. Zhang, P. Reunchan, Y. Zhang and J. Ye, *Energy Environ. Sci.*  
10 2011, **4**, 4211-4219.
- [S8] J. Hui, G. Zhang, C. Ni and J. T. S. Irvine, *Chem. Commun.* 2017, **53**, 10038-10041.
